# Supplementary material for: Germplasm evaluation and identification of the population source of hard clam (Mercenaria mercenaria) in China using SSR and COI markers
Source: Frontiers journal article supplement (doi:10.3389/fmars.2024.1362003), 2024-04-05
Supplement: Table_1.docx [file Table_1.docx]

Supplementary Material

**Germplasm evaluation and identification of the population source of hard clam (*Mercenaria mercenaria*) in China using SSR and COI markers**

## Supplementary Tables

**Supplementary Table 1:** PIC values for each loci.

| **Marker** | **PIC** |
| --- | --- |
| **RUMM021** | 0.5810 |
| **RUMM018** | 0.9417 |
| **RUMM047** | 0.5648 |
| **RUMM032** | 0.8631 |
| **RUMM034** | 0.7938 |
| **RUMM020** | 0.6957 |
| **RUMM017** | 0.7927 |
| **Mean** | 0.7475 |

**Supplementary Table 2:** Na at different loci in different populations

| Loci/Population | PJ | PT | TJ | ZZ | ZS | LYG | TS | YC | ZJ | VI | LE | RL | Mean |
| --- | --- | --- | --- | --- | --- | --- | --- | --- | --- | --- | --- | --- | --- |
| RUMM021 | 6 | 9 | 6 | 9 | 8 | 7 | 14 | 9 | 11 | 9 | 8 | 13 | 8.778 |
| RUMM018 | 10 | 16 | 16 | 17 | 20 | 17 | 18 | 20 | 14 | 15 | 20 | 16 | 16.444 |
| RUMM047 | 4 | 7 | 7 | 7 | 8 | 3 | 7 | 10 | 5 | 5 | 9 | 6 | 6.444 |
| RUMM032 | 9 | 13 | 11 | 13 | 13 | 14 | 12 | 15 | 14 | 8 | 14 | 14 | 12.667 |
| RUMM034 | 6 | 7 | 8 | 14 | 10 | 12 | 12 | 12 | 12 | 9 | 10 | 15 | 10.333 |
| RUMM020 | 2 | 4 | 5 | 4 | 6 | 6 | 4 | 5 | 5 | 4 | 8 | 6 | 4.556 |
| RUMM017 | 5 | 8 | 7 | 8 | 10 | 7 | 10 | 9 | 7 | 9 | 12 | 9 | 7.889 |
